# Supplementary material for: Single quantum dot rectifying diode with tunable threshold voltage
Source: Royal Society of Chemistry journal article supplement (doi:10.1039/c7tc02537h), 2017-01-01
Supplement: c7tc02537h1.pdf [file c7tc02537h1.pdf]

Supporting Information.

Received 00th January 20xx,  
Accepted 00th January 20xx

DOI: 10.1039/x0xx00000x

[www.rsc.org/](http://www.rsc.org/)

## Single Quantum Dot Rectifying Diode With Tunable Threshold Voltage

Gopal Sankar,<sup>‡</sup>Piyali Maity,<sup>¶</sup>Yogesh Kumar,<sup>‡</sup> Hemant Kumar,<sup>‡</sup>Vinod K Gangwar,<sup>€</sup>Sandip Chatterjee,<sup>€</sup>SatyabrataJit,<sup>‡</sup>Anup K Ghosh,<sup>¶</sup> and Bhola N. Pal<sup>‡\*</sup>

<sup>‡</sup>School of Material Science and Technology, <sup>‡</sup>Department of Electronics Engineering, <sup>€</sup>Department of Physics, Indian Institute of Technology (Banaras Hindu University), Varanasi-221005, India

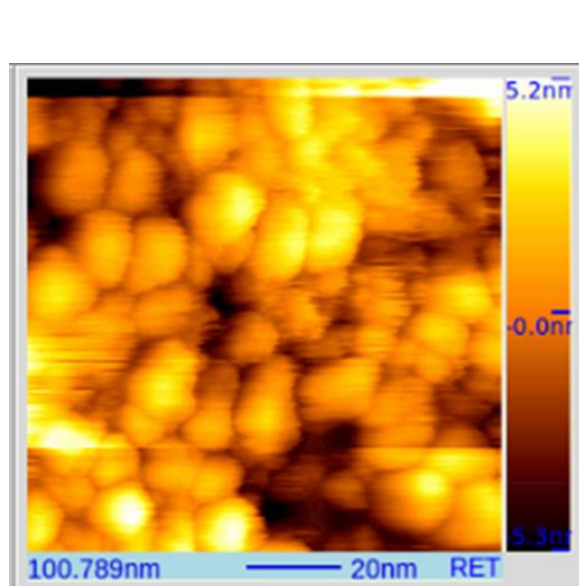

Figure S1. STM microgram for ZnO surface with a device structure ITO/ZnO

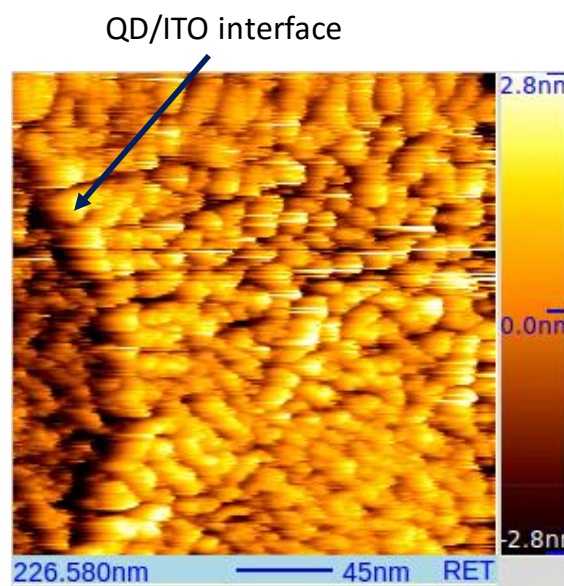

Figure S2. STM microgram for CdS (2% Co doped) surface with a device structure ITO/CdS.

Height difference in the interface indicates the monolayer formation on the substrate.

<sup>a</sup> Address here.

<sup>b</sup> Address here.

<sup>c</sup> Address here.

† Footnotes relating to the title and/or authors should appear here.

Electronic Supplementary Information (ESI) available: [details of any supplementary information available should be included here]. See DOI: 10.1039/x0xx00000x

<sup>†</sup> Department of  
Physics, Banaras Hindu  
University, Varanasi-  
221005, Indi

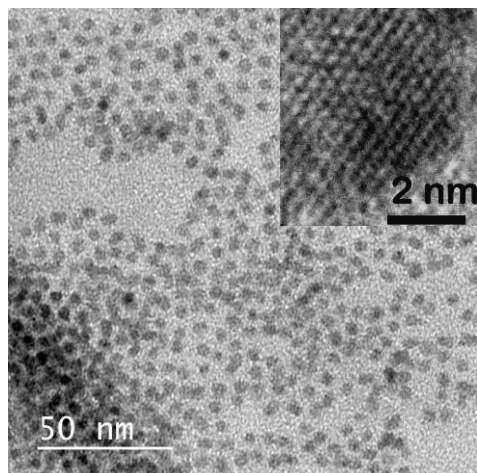

Figure S3. TEM picture of 4% doped CdS QDs . Inset shows the high resolution images of QD which clearly indicate the crystalline nature of QDs

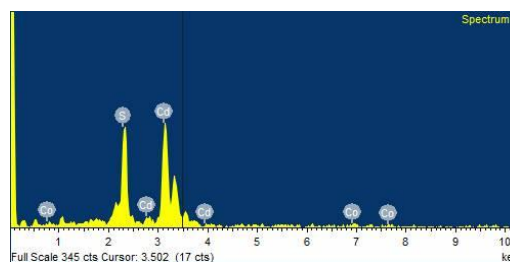

| Element | Weight% | Atomic% |
|---------|---------|---------|
| S K     | 21.29   | 47.78   |
| Co K    | 3.17    | 3.87    |
| Cd L    | 75.53   | 48.35   |

Figure S4. The energy dispersive X-ray analysis (EDXA) of this 4% doped QDs This data indicates the existence of Co around 3.87% in molar ratio

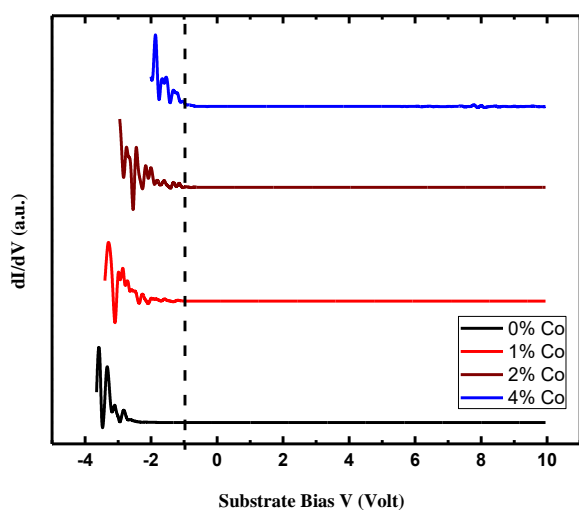

Figure S5.  $dI/dV$  Vs  $V$  plot for various Co doped CdS QDs with a device structure ITO/ZnO/CdS. Dotted line at  $V=-1V$  guided the variation of turn on conduction for different doped QD device.
